# Supplementary material
Source: ML conference proceedings conference paper supplement (https://openaccess.thecvf.com/content/ICCV2025/html/Zhang_Adversarial_Training_for_ICCV_2025_paper.html)
Supplement: Supplementary file 1 [file Zhang_Adversarial_Training_for_ICCV_2025_supplemental.pdf]

## A. Theoretical Analysis of AT-PR Algorithm Convergence

As discussed in Sec. 3.2, our algorithm’s effectiveness relies on two convergence assumptions: 1) Multi-Start PGD with random hyperparameters may find all local optima in Step 1; 2) Boundary search with adaptive hyperparameter may detect the local boundary in Step 2. We now provide their *proof sketch*, which will be included with more details in the main paper.

**Convergence of Multi-Start PGD.** It is known from the original PGD paper [36] that under *standard* assumptions of differentiability, Lipschitz continuity, and convex feasible set, a single PGD run converges to a local stationary point of  $L(x + \delta; \theta)$  (the local “loss landscape”). Assume  $L$  contains  $K$  distinct local maxima  $\{\delta_k^*\}_{k=1}^K$  corresponding to adversarial regions of varying sizes, with associated attraction basins  $\{\mathcal{A}_k\}_{k=1}^K$ . Let  $P_k$  denote the probability that a random PGD starting point  $\delta_0 \sim \text{Uniform}(\mathcal{B}(x, \gamma))$  lies within  $\mathcal{A}_k$ . Then, the probability that after  $N$  random initializations of PGD runs with varying step size, iterations, at least one PGD run finds a perturbation in  $\mathcal{A}_k$  is:

$$\mathbb{P}(\text{at least one PGD finds } \delta_k^*) = 1 - (1 - P_k)^N. \quad (5)$$

Since the events are independent, the probability that all  $K$  local optima are found after  $N$  runs is:

$$\mathbb{P}(\text{find all}) = \prod_{k=1}^K [1 - (1 - P_k)^N]. \quad (6)$$

This probability approaches 1 as  $N \rightarrow \infty$ .

**Convergence of Boundary Search.** The convergence of the boundary search step is already established in [9], where it is shown that under *standard* assumptions of local Lipschitz continuity and non-vanishing gradients near the decision boundary, it converges to an  $\epsilon$ -approximate boundary point in  $O(1/\epsilon)$  iterations. We apply this search directly, on the set of adversarial examples (AEs) obtained from Step 1.

## B. Hyperparameter Selection and Implementation Details

### B.1. Experiment Setup

All experiments are conducted on one NVIDIA GeForce RTX 4090 GPU, Python 3.11, PyTorch 2.3.1. For the CIFAR-10, CIFAR-100, and SVHN datasets, we independently train ResNet-18, and WideResNet-50-2 on each dataset, and additionally include a Vision Transformer (ViT) for CIFAR-10. For the TinyImageNet dataset, we train ResNet-18 and ResNet-34 using the same training configuration as for CIFAR-10. All models are trained using stochastic gradient descent (SGD) with a momentum of 0.9 [45] and a weight decay coefficient of  $5.0 \times 10^{-4}$ . Training

is performed for 200 epochs with an initial learning rate of 0.01, which is decayed by a factor of 10 at epochs 60, 120, and 150.

### B.2. Training Algorithms Hyperparameter Setting

- **FGSM.** We use a one-step gradient attack with  $\gamma = 8/255$ , applying FGSM at each training step for AT.
- **PGD.** We set the perturbation radius to  $\gamma = 8/255$  for all dataset. During training, we performed 10 steps of projected gradient descent attack, using a step size of  $\alpha = 2/255$  for CIFAR-10, CIFAR-100, and TinyImageNet, and a step size of  $\alpha = 1.25/255$  for SVHN.
- **TRADES.** We used the same step size and number of steps as described above for PGD. Additionally, we applied a weight of  $\lambda = 6.0$  for all datasets, following the approach in [66].
- **MART.** We used the same step size and number of steps as described above for PGD. Additionally, we applied a weight of  $\lambda = 5.0$  for all datasets, following the approach in [57].
- **ALP.** Follow the original work [29], we set  $\lambda = 1$  for all datasets, except  $\lambda = 0.5$  for SVHN.
- **CLP.** Following the same setting as ALP, we also set  $\lambda = 1$  for all datasets, except  $\lambda = 0.3$  for SVHN.
- **AT-PR.** For Algo. 1 Step 1, we apply PGD attacks to generate a diverse set of AEs. We set the size of AE candidate sets as  $N = 10$ , which our experiments show is sufficient to capture this diversity. We sample step sizes from  $\alpha_{\min} = 0.004$  to  $\alpha_{\max} = 0.01$ , and attack steps from  $step_{\min} = 7$  to  $step_{\max} = 12$  with  $\gamma = 8/255$ . For the boundary search in Steps 2 and 3, we set the maximum number of iterations to  $C = 20$ .

## C. Sketch Analysis of Generalization Errors

Following the recent **PAC-Bayes analysis for AR** [54], the generalization in PR can be bounded as:

$$R_{\text{PR}} \leq \hat{R}_{\text{PR}} + \text{TV}(\Pi \| \Delta) + \sqrt{\frac{\text{KL}(Q \| P) + \log(1/\delta)}{2n}}, \quad (7)$$

where  $R_{\text{PR}}$  is the expected PR error (measured over the true data distribution),  $\hat{R}_{\text{PR}}$  is the empirical PR error (measured over the training data),  $Q$  and  $P$  are the posterior and prior distributions of the DL model weights (measured by KL divergence).  $\text{TV}$  is the *total variation* of  $\Pi$  and  $\Delta$  which are distributions on inputs and perturbation norm-balls, i.e.,  $\mathcal{X} \times \mathcal{Y} \times \mathcal{B}$ .  $\Delta$  is the true natural perturbation distribution (same to the one used in PR evaluation); and  $\Pi$  denotes the AE distribution generated by the training procedure. Our AT-PR, by focusing on the “widest” adversarial regions rather than only “peaky” worst-case regions, leading to a  $\Pi$  that better aligns with  $\Delta$ . This reduces the total variation  $\text{TV}$  term and results in a tighter generalization bound compared to AT-WCR.
